# Supplementary material
Source: PubMed Central journal article supplement (PMC9304361)
Supplement: 41467_2022_31897_MOESM3_ESM.pdf [file 41467_2022_31897_MOESM3_ESM.pdf]

## **Description of Additional Supplementary Files**

File Name: Supplementary Data 1

Description: Risk differences of symptoms after 6-12 months, comparing SARS-CoV-2 test-positive and test-negative participants, stratified by sex and age group

File Name: Supplementary Data 2

Description: Risk differences of self-reported health problems with new onset between the test date and until 6-12 months after, comparing SARS-CoV-2 test-positive and test-negative participants, stratified by sex and age group

File Name: Supplementary Data 3

Description: Risk differences of self-reported diagnoses with new onset between the test date and until 6-12 months, after comparing SARS-CoV-2 test-positive and test-negative participants, stratified by sex and age group
